# Supplementary material for: Role of microglial cells in photoreceptor degeneration
Source: PubMed Central journal article supplement — Neural Regen Res. 2019 Jul;14(7):1186–90. doi: 10.4103/1673-5374.251204 (PMC6425827; doi:10.4103/1673-5374.251204), 2019-07
Supplement: NRR-14-1186_Suppl2.pdf [file NRR-14-1186_Suppl2.pdf]

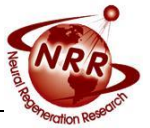**OPEN PEER REVIEW REPORT 2**

**Name of journal:** Neural Regeneration Research

**Manuscript NO:** NRR-D-18-00774

**Title:** Role of microglial cells in photoreceptor degenerations

**Reviewer's Name:** Annagrazia Adornetto

**Reviewer's country:** Italy

**Date sent for review:** 2018-11-30

**Date reviewed:** 2018-12-05

**Review time:** 5 days

**COMMENTS TO AUTHORS**

The manuscript entitled: "Role of microglial cells in photoreceptor degenerations" is well written and argued.

The authors have investigated the role of microglial cells in photoreceptor degenerations using two animal models with different genetic and pathogenic mechanisms of retinal degeneration: the P23H and the RCS rats and also they reported the anti-inflammatory effect of minocycline. These data are supported by well presented results and with good data statistics.
